# Supplementary material for: Transcriptome profiling revealed candidate genes, pathways and transcription factors related to nitrogen utilization and excessive nitrogen stress in perennial ryegrass
Source: PubMed Central journal article supplement (PMC8888628; doi:10.1038/s41598-022-07329-7), 2022-03-01
Supplement: 41598_2022_7329_MOESM4_ESM.pdf [file 41598_2022_7329_MOESM4_ESM.pdf]

table S4 Information of biosample and bioproject in NCBI database

| A            |             |        |                |        |          |               |             |                                                                                                             |
|--------------|-------------|--------|----------------|--------|----------|---------------|-------------|-------------------------------------------------------------------------------------------------------------|
| Accession    | Sample Name | SPUID  | Organism       | Tax ID | Cultivar | Isolate       | BioProject  | Object IDs and corresponding URLs                                                                           |
| SAMN15935733 | N0-1        | N0-1   | Lolium perenne | 4522   | Taya     | not collected | PRJNA660099 | 15935733: <a href="https://www.ncbi.nlm.nih.gov/sra/15935733">https://www.ncbi.nlm.nih.gov/sra/15935733</a> |
| SAMN15935734 | N0-2        | N0-2   | Lolium perenne | 4522   | Taya     | not collected | PRJNA660099 | 15935734: <a href="https://www.ncbi.nlm.nih.gov/sra/15935734">https://www.ncbi.nlm.nih.gov/sra/15935734</a> |
| SAMN15935735 | N0-3        | N0-3   | Lolium perenne | 4522   | Taya     | not collected | PRJNA660099 | 15935735: <a href="https://www.ncbi.nlm.nih.gov/sra/15935735">https://www.ncbi.nlm.nih.gov/sra/15935735</a> |
| SAMN15935736 | N0.5-1      | N0.5-1 | Lolium perenne | 4522   | Taya     | not collected | PRJNA660099 | 15935736: <a href="https://www.ncbi.nlm.nih.gov/sra/15935736">https://www.ncbi.nlm.nih.gov/sra/15935736</a> |
| SAMN15935737 | N0.5-2      | N0.5-2 | Lolium perenne | 4522   | Taya     | not collected | PRJNA660099 | 15935737: <a href="https://www.ncbi.nlm.nih.gov/sra/15935737">https://www.ncbi.nlm.nih.gov/sra/15935737</a> |
| SAMN15935738 | N0.5-3      | N0.5-3 | Lolium perenne | 4522   | Taya     | not collected | PRJNA660099 | 15935738: <a href="https://www.ncbi.nlm.nih.gov/sra/15935738">https://www.ncbi.nlm.nih.gov/sra/15935738</a> |
| SAMN15935739 | N1-1        | N1-1   | Lolium perenne | 4522   | Taya     | not collected | PRJNA660099 | 15935739: <a href="https://www.ncbi.nlm.nih.gov/sra/15935739">https://www.ncbi.nlm.nih.gov/sra/15935739</a> |
| SAMN15935740 | N1-2        | N1-2   | Lolium perenne | 4522   | Taya     | not collected | PRJNA660099 | 15935740: <a href="https://www.ncbi.nlm.nih.gov/sra/15935740">https://www.ncbi.nlm.nih.gov/sra/15935740</a> |
| SAMN15935741 | N1-3        | N1-3   | Lolium perenne | 4522   | Taya     | not collected | PRJNA660099 | 15935741: <a href="https://www.ncbi.nlm.nih.gov/sra/15935741">https://www.ncbi.nlm.nih.gov/sra/15935741</a> |
| SAMN15935742 | N10-1       | N10-1  | Lolium perenne | 4522   | Taya     | not collected | PRJNA660099 | 15935742: <a href="https://www.ncbi.nlm.nih.gov/sra/15935742">https://www.ncbi.nlm.nih.gov/sra/15935742</a> |
| SAMN15935743 | N10-2       | N10-2  | Lolium perenne | 4522   | Taya     | not collected | PRJNA660099 | 15935743: <a href="https://www.ncbi.nlm.nih.gov/sra/15935743">https://www.ncbi.nlm.nih.gov/sra/15935743</a> |
| SAMN15935744 | N10-3       | N10-3  | Lolium perenne | 4522   | Taya     | not collected | PRJNA660099 | 15935744: <a href="https://www.ncbi.nlm.nih.gov/sra/15935744">https://www.ncbi.nlm.nih.gov/sra/15935744</a> |

| B          |             |              |
|------------|-------------|--------------|
|            | ID          | Release date |
| Submission | SUB7282502  | 2021/8/1     |
| BioProject | PRJNA660099 | 2021/8/1     |
